# Supplementary material for: Monitoring spin-crossover phenomena via Re(i) luminescence in hybrid Fe(ii) silica coated nanoparticles
Source: Royal Society of Chemistry journal article supplement (doi:10.1039/d1dt03334d), 2021-01-01
Supplement: d1dt03334d1.pdf [file d1dt03334d1.pdf]

## SUPPORTING INFORMATION

### **Monitoring Spin-Crossover phenomena via Re(I) luminescence in hybrid Fe(II) silica coated nanoparticles**

Ismael Francisco Díaz-Ortega,<sup>†,‡</sup> Eva Luz Fernández-Barbosa,<sup>†</sup> Silvia Titos-Padilla,<sup>†</sup> Simon J. A. Pope,<sup>||</sup> Juan-Ramón Jiménez,<sup>\*†</sup> Enrique Colacio<sup>\*†</sup> and Juan Manuel Herrera.<sup>\*†</sup>

<sup>†</sup> *Departamento de Química Inorgánica, Facultad de Ciencias, Universidad de Granada and Unidad de Excelencia de Química (UEQ), Avda. Fuentenueva s/n, 18071, Granada, Spain.* <sup>‡</sup> *Departamento de Química y Física-CIESOL, Universidad de Almería, Ctra. Sacramento s/n, 04120, Almería.* <sup>||</sup> *Cardiff School of Chemistry, Cardiff University, Cardiff, CF10 3AT, UK.*

## 1.- X-Ray Powder Diffraction Analysis.

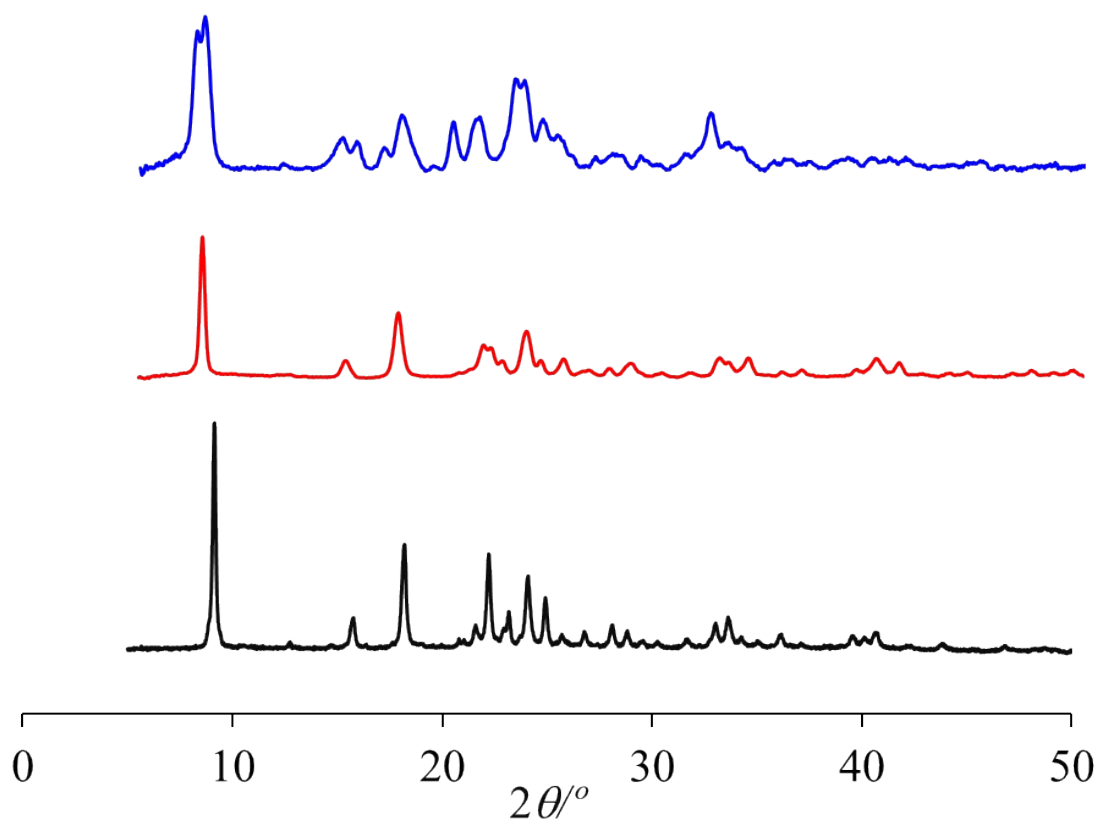

**Figure S1.** Experimental XRPD diagrams for bulk [Fe(NH<sub>2</sub>-Trz)<sub>3</sub>](BF<sub>4</sub>)<sub>2</sub> polymer (black) and samples **1** (red) and **1@SiO<sub>2</sub>** (blue).

## 2.- Elemental Analysis.

The molecular weights determined by elemental analysis were considered to determine the molar magnetic susceptibility.

| Sample                      |       | C<br>[%] | N<br>[%] | H<br>[%] | Proposed Formula                                                                                                             |
|-----------------------------|-------|----------|----------|----------|------------------------------------------------------------------------------------------------------------------------------|
| <b>1</b>                    | Found | 14.70    | 33.11    | 3.17     | [Fe(NH <sub>2</sub> Trz) <sub>3</sub> ](BF <sub>4</sub> ) <sub>2</sub> ·H <sub>2</sub> O                                     |
|                             | calcd | 14.39    | 33.60    | 2.82     | MW = 500.08 gmol <sup>-1</sup>                                                                                               |
| <b>1@SiO<sub>2</sub></b>    | Found | 12.29    | 28.51    | 2.87     | [Fe(NH <sub>2</sub> Trz) <sub>3</sub> ](BF <sub>4</sub> ) <sub>2</sub> ·(SiO <sub>2</sub> ) <sub>1.5</sub> ·H <sub>2</sub> O |
|                             | calcd | 12.20    | 28.48    | 2.39     | MW = 590.03 gmol <sup>-1</sup>                                                                                               |
| <b>1@SiO<sub>2</sub>/Re</b> | Found | 14.85    | 28.79    | 2.98     | -----                                                                                                                        |
|                             | calcd | ---      | ---      | ---      |                                                                                                                              |

**Table S1.-** Elemental analyses for samples **1**, **1@SiO<sub>2</sub>** and **1@SiO<sub>2</sub>/Re**.

### 3.- NMR characterization.

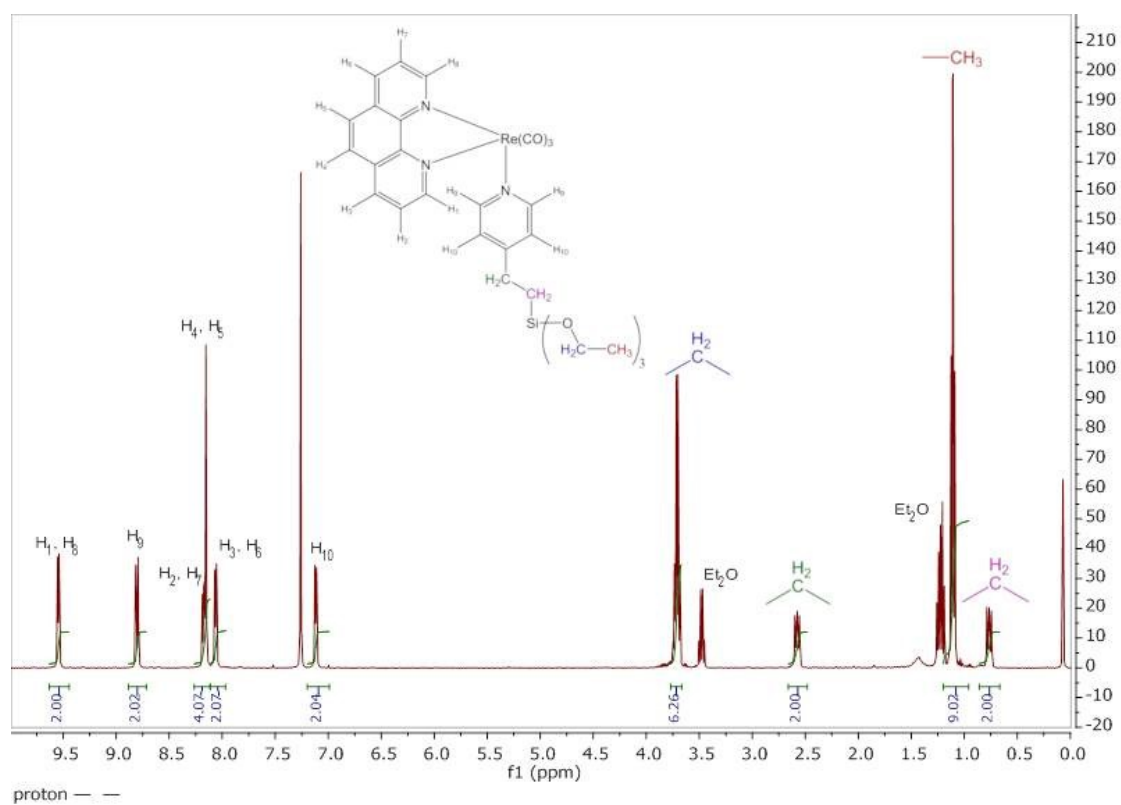

Figure S2.-  $^1\text{H-NMR}$  spectrum of **Re** in  $\text{CD}_3\text{Cl}$ .

#### 4.- Kinetics for Time-resolved photoluminescence of Re and 1@SiO<sub>2</sub>/Re.

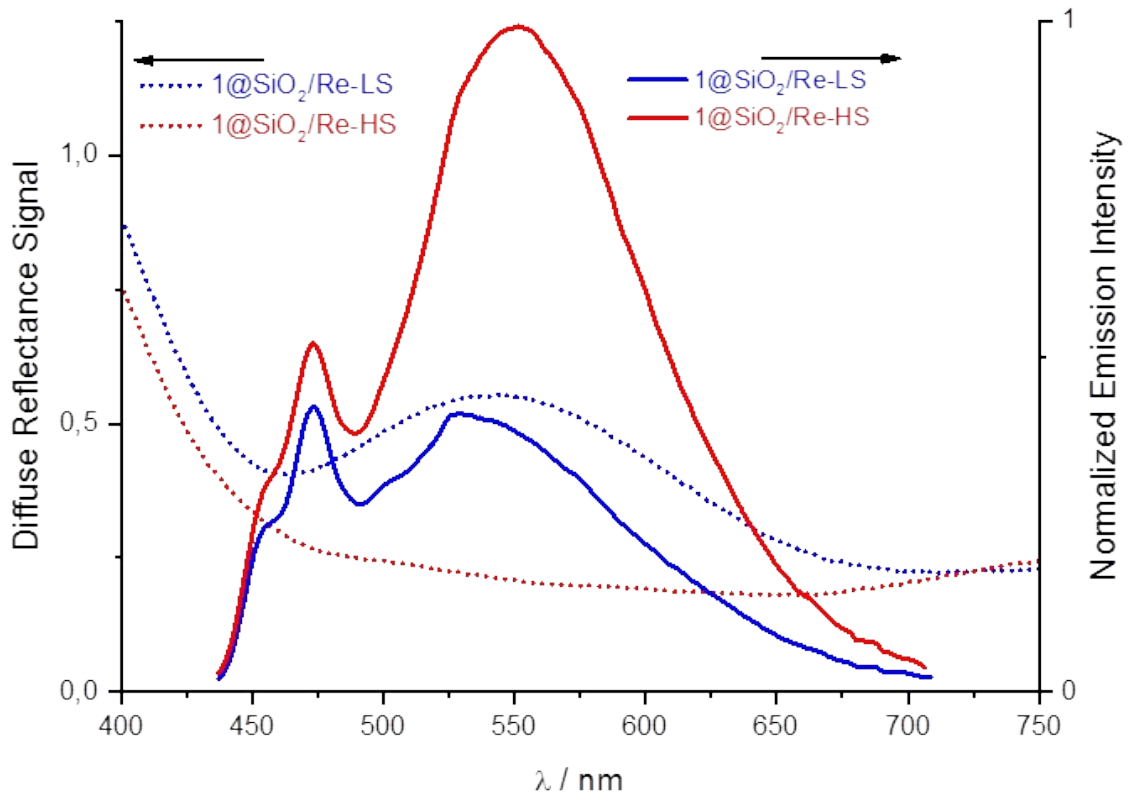

**Figure S3.-** Diffuse reflectance (dotted lines) and Emission (full lines) spectra of **1@SiO<sub>2</sub>/Re** measured at T = 280 K (blue) and T = 330 K (red).

Solid state samples were excited at  $\lambda_{exc.} = 350$  nm at two different temperatures, T = 273 K and T = 330 K. Decays were fitted to the two or three-exponential functions:

$$I = A_1 e^{-\frac{t}{\tau_1}} + A_2 e^{-\frac{t}{\tau_2}} + y_0 \quad \text{eq. 1}$$

$$I = A_1 e^{-\frac{t}{\tau_1}} + A_2 e^{-\frac{t}{\tau_2}} + A_3 e^{-\frac{t}{\tau_3}} + y_0 \quad \text{eq. 2}$$

The mean lifetime value was calculated as:

$$\tau_{mean} = \frac{(A_1 \times \tau_1 + A_2 \times \tau_2 + \dots)}{(A_1 + A_2 + \dots)} \quad \text{eq. 3}$$

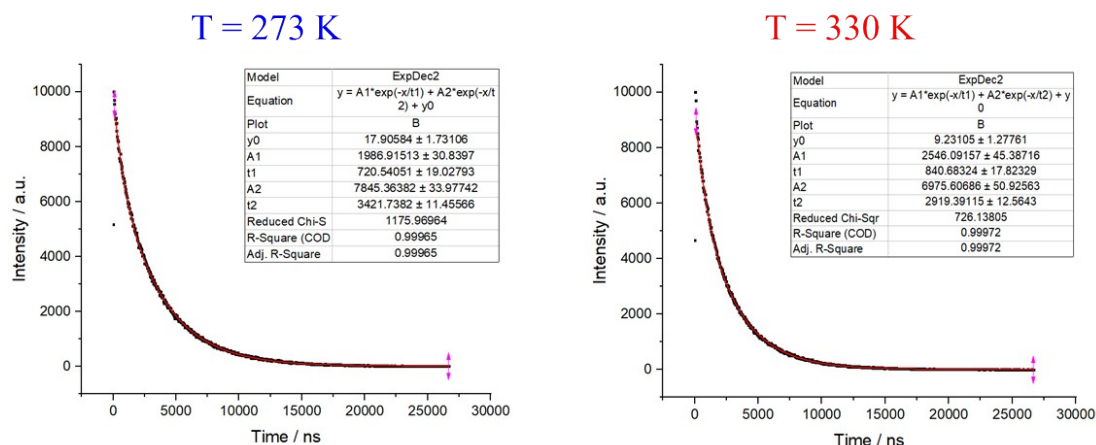

**Figure S4.-** Excited state decay profiles of **Re** at 273 and 330 K (black dots) and biexponential fits (red).

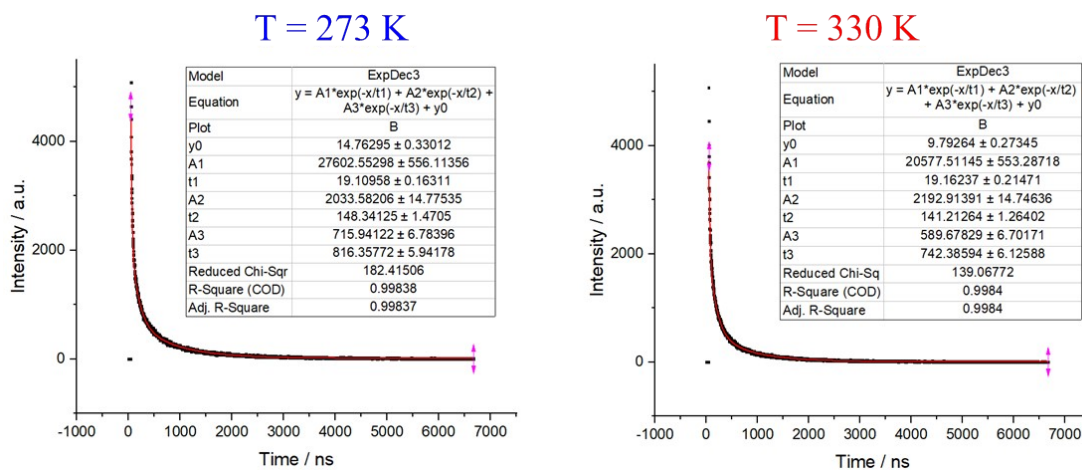

**Figure S5.-** Excited state decay profiles of **1@SiO<sub>2</sub>/Re** at 273 and 330 K (black dots) and biexponential fits (red).

| Compounds                                | $\tau_1$ / ns | $\tau_2$ / ns | $\tau_3$ / ns | <i>A1</i> | <i>A2</i> | <i>A3</i> | $\tau_{\text{mean}}/\text{ns}$ |
|------------------------------------------|---------------|---------------|---------------|-----------|-----------|-----------|--------------------------------|
| <b>Re</b> ( T = 273K)                    | 720           | 3421          | ---           | 1986      | 7845      | ---       | 2875                           |
| <b>Re</b> ( T = 330 K)                   | 788           | 2896          | ---           | 2502      | 7083      | ---       | 2346                           |
| <b>1@SiO<sub>2</sub>/Re</b><br>( T 273K) | 17            | 131           | 780           | 28626     | 1798      | 620       | 39                             |
| <b>1@SiO<sub>2</sub>/Re</b><br>( T 330K) | 15            | 127           | 701           | 37848     | 2390      | 701       | 33                             |

**Table S2.** Excited-state lifetimes ( $\lambda_{\text{ex}} = 395\text{nm}$ ) of **Re** and **1@SiO<sub>2</sub>/Re** in the solid state at T = 273 K and T = 330 K.

## 6.- Magnetic Properties of sample 1@SiO<sub>2</sub>/Re.

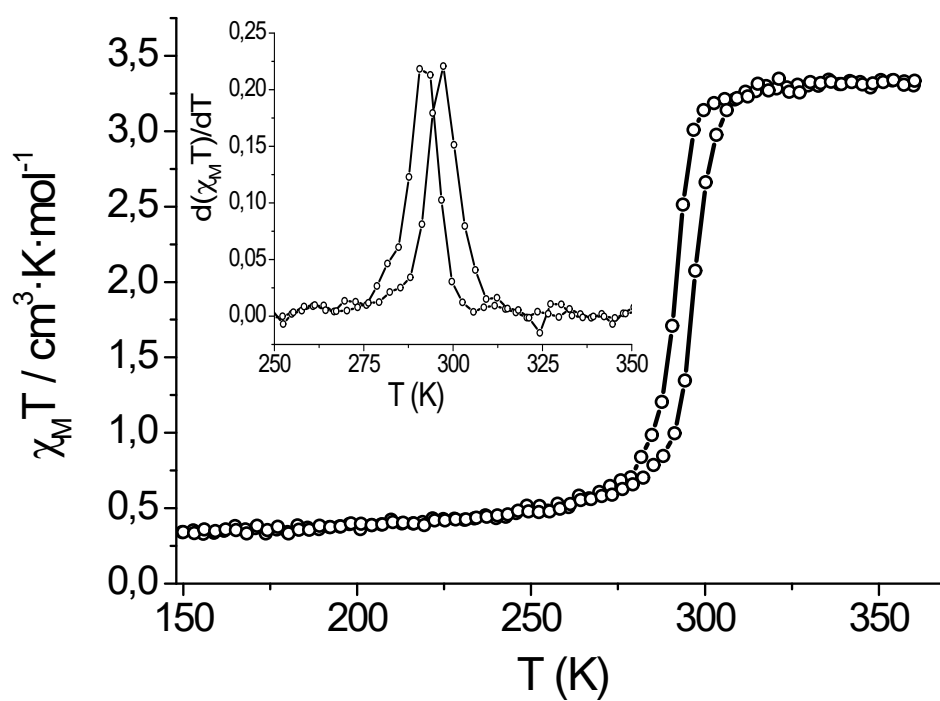

**Figure S6.** Thermal dependence of the  $\chi_M T$  product for sample 1@SiO<sub>2</sub>/Re under an applied magnetic field  $H_{dc} = 1$  T.

### 3.- Thermal dependence of the excitation spectrum for sample 1@SiO<sub>2</sub>/Re.

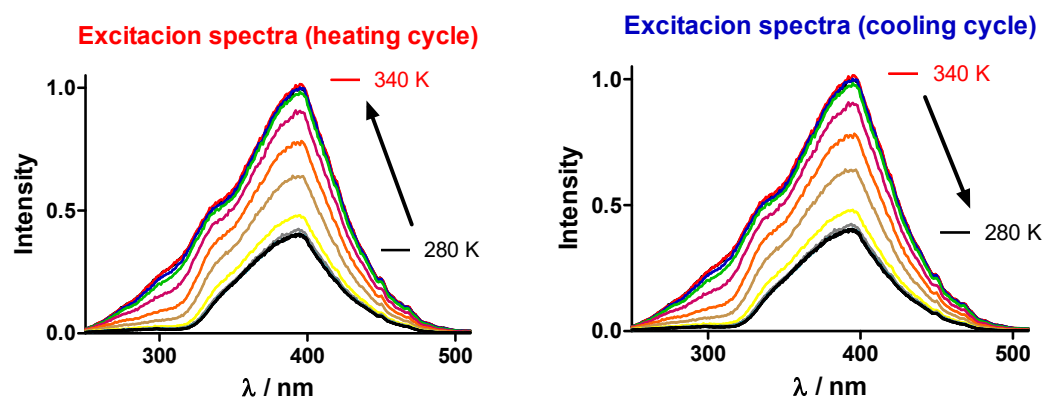

**Figure S7.-** Variation of the excitation spectra of 1@SiO<sub>2</sub> upon heating (left) and cooling (right) cycles.
